# Supplementary material for: Software tools to support title and abstract screening for systematic reviews in healthcare: an evaluation
Source: BMC Med Res Methodol. 2020 Jan 13;20:7. doi: 10.1186/s12874-020-0897-3 (PMC6958795; doi:10.1186/s12874-020-0897-3)
Supplement: Supplementary file 2 — Additional file 2. Questionnaire template. [file 12874_2020_897_MOESM2_ESM.xlsx]

## Sheet: Sign-up Information
Software	Link	Instructions
Covidence	https://www.covidence.org/home	Follow the link and click “start free trial”. You will be asked to fill in a few details in order to create an account. Covidence will then send a verification email to confirm the account (this may take up to an hour).
EPPI-reviewer	http://eppi.ioe.ac.uk/cms/Default.aspx?alias=eppi.ioe.ac.uk/cms/er4	Follow the link and scroll down to see “Start using EPPI-Reviewer 4 today by signing up for a free one month trial here!”, clink on this link which will take you to a page where you can create a “new account.” You will have to enter some information to create an account and a verification email will be sent to you. Once you have verified, you will be able to log in to your account at http://eppi.…
Colandr	https://colandrapp.com/signin	Follow the link and click "sign-up". You will be asked for your name and email address in order to create an account. You will then be sent a verification email (this may take up to an hour).
Rayyan	https://rayyan.qcri.org/welcome	Follow the link above to sign-up, you will have to put in a few details about yourself. You will then be sent a confirmation email with a link to verify the account (this might take up to an hour).
DRAGON	https://icfdragon.com/login	We have been offered a one off month long free trial of DRAGON for several users. I will need to give them your email addresses first, so that they put you on an approved list. Please let me know if you are happy for me to do this and what email address you would like me to give them. After we have done this, follow the link to sign-up. You should get a confirmation email within a couple of days.…
Abstrackr	http://abstrackr.cebm.brown.edu/account/login	Follow the link and click “register here”. You will have to give a few details to create an account. Your account should be created straight away.

## Sheet: About the Researchers
Is this section you will be asked some questions about yourself and your experiences working on systematic reviews. Please complete this section first.	General Information		Systematic Review Experience						If you have previously contributed to title and abstract screening…				Preferences and Recommendations
	Name (free text)	Research Position	Have you contributed to systematic reviews?	Have you led systematic review projects?	Approximately how many systematic review projects have you been involved with in the last year?	Have you been involved with the T&Ab screening of any systematic review project? (tick all that apply)			How do you typically manage title and abstract screening?		Have you previously used software designed to support T&Ab screening for systematic reviews (e.g. Covidence?)	If yes, please list the software you have experience with. (free text)	Would it be your preference to use a software tool for T&Ab screening?	Why? (free text)	Do you think that using this type of tool would be well received by collaborators?	Why? (free text)
						I have carried out T&Ab screening	I have managed the T&Ab screening phase	No	Type of System	Please give the specific tool used (e.g. Endnote/Excel) (free text)
Researcher

## Sheet: About the Software
The Software Tools	Creating an account and signing up							Creating a systematic review project							Inviting collaborators to join the project							Uploading citations to the project							Carrying out T&Ab screening of your uploaded citations							Exporting decisions made during the screening process							Finding and using the help section/tutorial/user guide
	On a scale of 1 (very difficult) to 5 (very easy) how was your experience of this task?					Did you encounter any problems with this task?	If yes, what were the problems you encountered? (free text)	On a scale of 1 (very difficult) to 5 (very easy) how was your experience of this task?					Did you encounter any problems with this task?	If yes, what were the problems you encountered? (free text)	On a scale of 1 (very difficult) to 5 (very easy) how was your experience of this task?					Did you encounter any problems with this task?	If yes, what were the problems you encountered? (free text)	On a scale of 1 (very difficult) to 5 (very easy) how was your experience of this task?					Did you encounter any problems with this task?	If yes, what were the problems you encountered? (free text)	On a scale of 1 (very difficult) to 5 (very easy) how was your experience of this task?					Did you encounter any problems with this task?	If yes, what were the problems you encountered? (free text)	On a scale of 1 (very difficult) to 5 (very easy) how was your experience of this task?					Did you encounter any problems with this task?	If yes, what were the problems you encountered? (free text)	On a scale of 1 (very difficult) to 5 (very easy) how was your experience of this task?					Did you encounter any problems with this task?	If yes, what were the problems you encountered? (free text)
	1	2	3	4	5			1	2	3	4	5			1	2	3	4	5			1	2	3	4	5			1	2	3	4	5			1	2	3	4	5			1	2	3	4	5
Rayyan
DRAGON
Abstrackr
EPPI-reviewer
Covidence
Colandr
[truncated: 9 more columns]
